# Supplementary material
Source: Springer Nature journal article supplement (https://www.springermedizin.de/resource/supplementary/12890_2014_596_MOESM8_ESM.pdf/9505400)

ICM: average  $\Delta I_{sc}$  (forskolin/IBMX +  
carbachol+histamine)( $\mu A/cm^2$ )

150  
120  
90  
60  
30

Non-smokers

Smokers

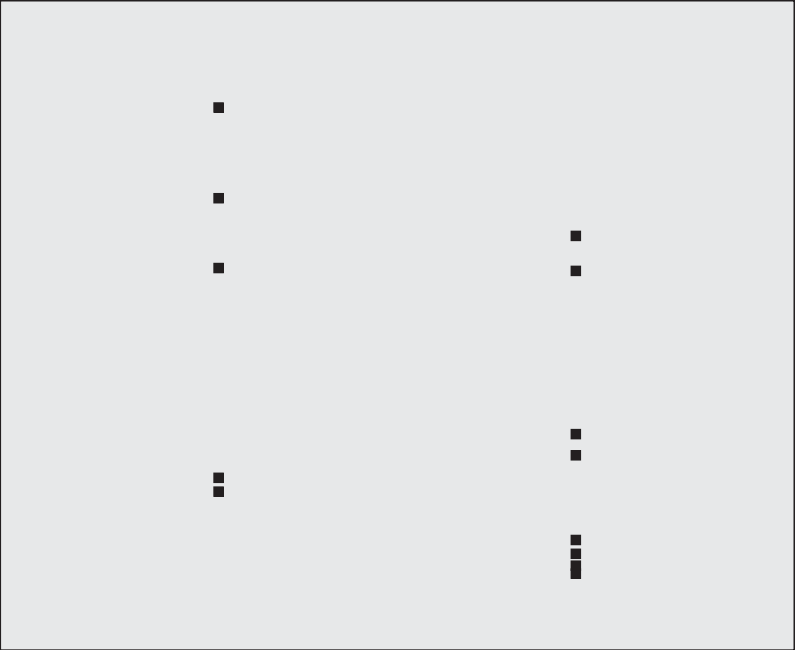

Supplement: MOESM8 [file 9505400]
